# Supplementary material for: The Next PAGE in Understanding Complex Traits: Design for the Analysis of Population Architecture Using Genetics and Epidemiology (PAGE) Study
Source: PubMed Central journal article supplement — Am J Epidemiol. 2011 Aug 11;174(7):849–59. doi: 10.1093/aje/kwr160 (PMC3176830; doi:10.1093/aje/kwr160), 2011-08-11
Supplement: supp_kwr160_kwr160_web_material.pdf [file supp_kwr160_kwr160_web_material.pdf]

Web Figure 1. The PAGE results browser grid plot. The gridplot display shows p-values across SNPs and phenotypes. Different color palettes indicate positive and negative associations. Preliminary PAGE data were used for this plot.

Web Figure 2. The PAGE results browser box plot. The boxplot display shows the 1st, 2nd, and 3rd quantiles by genotype for SNPs and (quantitative) phenotypes. Preliminary PAGE data were used for this plot.

Web Figure 3. The PAGE results browser forest plot. The forest plot display shows effect estimates and 95% confidence intervals across studies. Simulated data were used for this plot.



Web Figure 2

SNP x Study x Phenotype x Sex [\[Download Data\]](#)

|            | Phenotype | coregluc - Core Glucose (Mg/dl) | corehdl3 - Core High-Density Lipoprotein-3 (Mg/dl) | coreldlc - Core LDL Cholesterol (Mg/dl) |
|------------|-----------|---------------------------------|----------------------------------------------------|-----------------------------------------|
| SNP        | Study\Sex | Female                          | Female                                             | Female                                  |
| rs 2494250 | WHI       |                                 |                                                    |                                         |
| rs 144300  | WHI       |                                 |                                                    |                                         |

Web Figure 3

SNP x Study x Phenotype x Sex [\[Download Data\]](#)

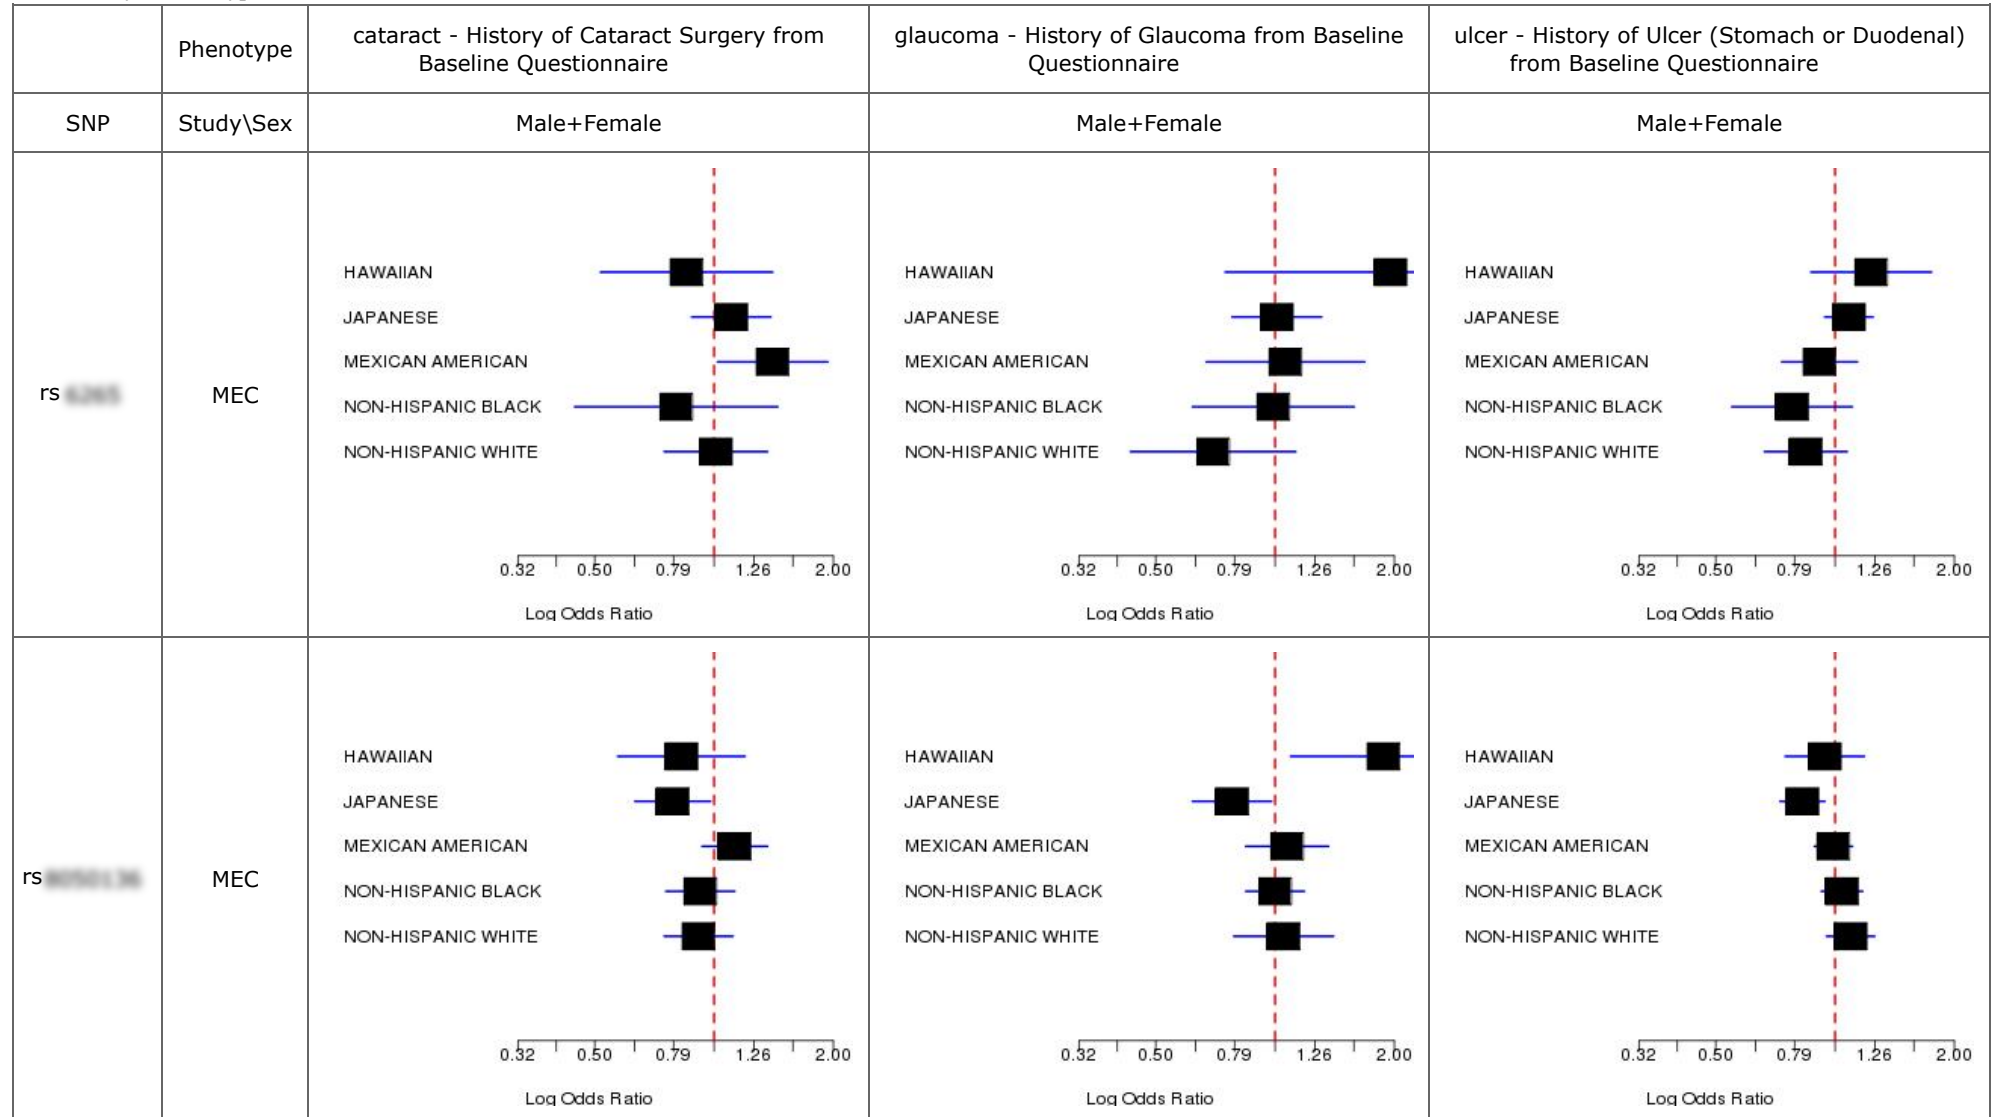

**Web Table 1. PAGE-wide power to replicate and generalize SNPs previously associated with LDL-C levels.**

A total of 19 SNPs previously associated with LDL-C levels were genotyped by at least two PAGE study sites. Each SNP, its chromosomal and base-pair location (based on Genome Build 37), its putative function based on location, and the nearest gene are given in the first four columns of the table. The number of PAGE study sites that genotyped each SNP is denoted, with four PAGE study sites representing the maximum. The expected genetic effect size ( $\beta$ ) is based on the literature, and the reference is indicated in the Table. For each test of association, we calculated the power to detect the expected effect size assuming a significance threshold of 0.005 and the coded allele frequency observed in the population. In the power columns, “(+)” denotes that the sample size for that test of association has sufficient power (>80%) to detect the expected effect size at  $P = 0.005$ .

| SNP        | Chr.<br>(Location) | Function           | Nearest Gene                 | # PAGE<br>Studies <sup>a</sup> | Effect<br>Size <sup>‡</sup><br>(mg/dl) | Reference                             | EA<br>CAF<br>(Power) | AA<br>CAF<br>(Power) | AI<br>CAF<br>(Power) | MA/H<br>CAF<br>(Power) |
|------------|--------------------|--------------------|------------------------------|--------------------------------|----------------------------------------|---------------------------------------|----------------------|----------------------|----------------------|------------------------|
| rs11206510 | 1<br>(55495789)    | Intergenic         | <i>PCSK9</i>                 | 4                              | 3.04                                   | Willer et al<br>2008 <sup>1</sup>     | 0.81<br>(+)          | 0.86<br>(-)          | 0.93<br>(-)          | 0.88<br>(-)            |
| rs11591147 | 1<br>(55505397)    | Non-<br>synonymous | <i>PCSK9</i>                 | 3                              | -17.1                                  | Kathiresan<br>et al 2009 <sup>2</sup> | 0.02<br>(+)          | 4.10E-03<br>(-)      | 0.01<br>(+)          | 0.01<br>(-)            |
| rs646776   | 1<br>(109818280)   | Downstream         | <i>CELSR2/PSRC/<br/>SORT</i> | 4                              | 6.18                                   | Kathiresan<br>et al 2008 <sup>3</sup> | 0.78<br>(+)          | 0.65<br>(+)          | N/a                  | 0.81<br>(+)            |
| rs599839   | 1<br>(109821916)   | Downstream         | <i>CELSR2/PSRC/<br/>SORT</i> | 3                              | 5.48                                   | Willer et al<br>2008 <sup>1</sup>     | 0.77<br>(+)          | 0.28<br>(+)          | 0.78<br>(+)          | 0.78<br>(-)            |
| rs693      | 2<br>(21231945)    | Synonymous         | <i>APOB</i>                  | 4                              | 2.44                                   | Willer et al<br>2008 <sup>1</sup>     | 0.50<br>(+)          | 0.24<br>(-)          | 0.34<br>(+)          | 0.38<br>(-)            |
| rs562338   | 2<br>(21288071)    | Intergenic         | <i>APOB</i>                  | 4                              | -4.89                                  | Willer et al<br>2008 <sup>1</sup>     | 0.19<br>(+)          | 0.59<br>(+)          | 0.09<br>(+)          | 0.16<br>(+)            |
| rs754523   | 2<br>(21311441)    | Intergenic         | <i>APOB</i>                  | 4                              | -2.78                                  | Willer et al<br>2008 <sup>1</sup>     | 0.68<br>(+)          | 0.78<br>(-)          | 0.66<br>(+)          | 0.72<br>(-)            |
| rs6544713  | 2                  | Intronic           | <i>ABCG8</i>                 | 4                              | 5.1                                    | Kathiresan                            | 0.31                 | 0.17                 | 0.11                 | 0.18                   |

|            |                               |            |                                    |   |                    |                                                                  |                    |                    |                    |                    |
|------------|-------------------------------|------------|------------------------------------|---|--------------------|------------------------------------------------------------------|--------------------|--------------------|--------------------|--------------------|
| rs12654264 | (44073631)<br>5<br>(74648353) | Intronic   | <i>HMGCR</i>                       | 4 | -3.86              | et al 2009 <sup>2</sup><br>Kathiresan<br>et al 2008 <sup>3</sup> | (+)<br>0.62<br>(+) | (+)<br>0.67<br>(+) | (+)<br>0.58<br>(+) | (+)<br>0.62<br>(+) |
| rs1501908  | 5<br>(156397919)              | Intergenic | <i>TIMD4</i>                       | 3 | 2.38               | Kathiresan<br>et al 2009 <sup>2</sup>                            | 0.64<br>(+)        | 0.37<br>(-)        | 0.85<br>(-)        | 0.76<br>(-)        |
| rs2650000  | 12<br>(121388712)             | Intergenic | <i>HNF1A</i>                       | 3 | 2.38               | Kathiresan<br>et al 2009 <sup>2</sup>                            | 0.35<br>(+)        | 0.12<br>(-)        | 0.41<br>(+)        | 0.37<br>(-)        |
| rs6511720  | 19<br>(11202056)              | Intronic   | <i>LDLR</i>                        | 4 | -6.99              | Teslovich<br>et al 2010 <sup>4</sup>                             | 0.12<br>(+)        | 0.13<br>(+)        | 0.07<br>(+)        | 0.08<br>(+)        |
| rs2228671  | 19<br>(11210662)              | Synonymous | <i>LDLR</i>                        | 2 | -0.14 <sup>‡</sup> | Aulchenko<br>et al 2009 <sup>5</sup>                             | 0.12<br>(+)        | 0.04<br>(-)        | N/a                | 0.08<br>(-)        |
| rs16996148 | 19<br>(19658222)              | Downstream | <i>CILP2/PBX4/N<br/>CAN</i>        | 4 | -3.32              | Willer et al<br>2008 <sup>1</sup>                                | 0.08<br>(+)        | 0.15<br>(+)        | 0.04<br>(-)        | 0.06<br>(-)        |
| rs4803750  | 19<br>(45247627)              | Upstream   | <i>BCL3</i>                        | 2 | 10.92 <sup>†</sup> | Sandhu et<br>al 2008 <sup>6</sup>                                | 0.93<br>(+)        | 0.92<br>(+)        | N/a                | 0.86<br>(-)        |
| rs10402271 | 19<br>(45329214)              | Downstream | <i>APOE/C1/C4<br/>gene cluster</i> | 2 | -2.62              | Willer et al<br>2008 <sup>1</sup>                                | 0.67<br>(+)        | 0.84<br>(-)        | N/a                | 0.61<br>(-)        |
| rs4420638  | 19<br>(45422696)              | Downstream | <i>APOE/C1/C4<br/>gene cluster</i> | 4 | -7.14              | Teslovich<br>et al 2010 <sup>4</sup>                             | 0.82<br>(+)        | 0.79<br>(+)        | 0.90<br>(+)        | 0.90<br>(+)        |
| rs2075650  | 19<br>(50087459)              | Intronic   | <i>TOMM40</i>                      | 2 | -0.16 <sup>‡</sup> | Aulchenko<br>et al 2009 <sup>5</sup>                             | 0.88<br>(+)        | 0.87<br>(-)        | N/a                | 0.90<br>(-)        |
| rs6102059  | 20<br>(39228784)              | Intergenic | <i>MAFB</i>                        | 3 | -2.04              | Kathiresan<br>et al 2009 <sup>2</sup>                            | 0.30<br>(+)        | 0.43<br>(-)        | N/a                | 0.29<br>(-)        |

Abbreviations: Base(-)pair (bp), untranslated region (UTR); coded allele frequency (CAF); European American (EA); African

American (AA); American Indian (AI); Mexican American /Hispanic (MA/H)

<sup>a</sup>Number of PAGE studies that genotyped the SNP. PAGE studies include CALiCo, EAGLE, MEC, and WHI.

<sup>‡</sup>Effect size ( $\beta$ ) is reported in s.d. (standard deviation) units

<sup>†</sup>Effect size originally expressed in mmol/L

Maximum sample sizes: EA = 21,986; AA = 9,328; AI = 6,144; MA/H = 2,532

## References

1. Willer, C.J., Sanna, S., Jackson, A.U., Scuteri, A., Bonnycastle, L.L., Clarke, R., Heath, S.C., Timpson, N.J., Najjar, S.S., Stringham, H.M. et al. (2008). Newly identified loci that influence lipid concentrations and risk of coronary artery disease. *Nat Genet* *40*, 161(-)169.
2. Kathiresan, S., Willer, C.J., Peloso, G.M., Demissie, S., Musunuru, K., Schadt, E.E., Kaplan, L., Bennett, D., Li, Y., Tanaka, T. et al. (2009). Common variants at 30 loci contribute to polygenic dyslipidemia. *Nat Genet* *41*, 56(-)65.
3. Kathiresan, S., Melander, O., Guiducci, C., Surti, A., Burt, N.P., Rieder, M.J., Cooper, G.M., Roos, C., Voight, B.F., Havulinna, A.S. et al. (2008). Six new loci associated with blood low(-)density lipoprotein cholesterol, high(-)density lipoprotein cholesterol or triglycerides in humans. *Nat Genet* *40*, 189(-)197.
4. Teslovich, T.M., Musunuru, K., Smith, A.V., Edmondson, A.C., Stylianou, I.M., Koseki, M., Pirruccello, J.P., Ripatti, S., Chasman, D.I., Willer, C.J. et al. (2010). Biological, clinical and population relevance of 95 loci for blood lipids. *Nature* *466*, 707(-)713.
5. Aulchenko, Y.S., Ripatti, S., Lindqvist, I., Boomsma, D., Heid, I.M., Pramstaller, P.P., Penninx, B.W., Janssens, A.C., Wilson, J.F., Spector, T. et al. (2009). Loci influencing lipid levels and coronary heart disease risk in 16 European population cohorts. *Nat Genet* *41*, 47(-)55.
6. Sandhu, M.S., Waterworth, D.M., Debenham, S.L., Wheeler, E., Papadakis, K., Zhao, J.H., Song, K., Yuan, X., Johnson, T., Ashford, S. et al. (2008). LDL(-)cholesterol concentrations: a genome(-)wide association study. *Lancet* *371*, 483(-)491.
